# Supplementary material
Source: MDPI journal article supplement (https://www.mdpi.com/1999-4907/8/12/473)
Supplement: s1 [file s1]

**Supplementary Materials**

**Table S1.** Soil acidity (pHH2O) and base saturation (BS%) per site and horizon for the pine plantation (*Pinus patula*) sites (DOS: Dos Puentes, SAN: Santiago, VIL: Villonaco, ZAM: Zamora-Huayco) included in this study. Values represent mean with standard error in parenthesis for the organic layer (O horizon) and for the mineral soil horizons A-B-C (mineral topsoil: 0–60 cm). Different letters indicate significant differences between sites per soil horizon (Benjamini and Hochberg pairwise procedure (HB) after Kruskal-Wallis test, *p* < 0.05). nDOS = 6; nSAN = 3; nVIL = 7; nZAM = 7.

| **Site** | **Horizon** | **pH(H2O)** | **BS** |
| --- | --- | --- | --- |
| SAN | O | 5.8 (0.5) a | 93.7 (2.1) a |
| A | 4.8 (0.1) ab | 32.7 (21) a |
| B | 4.9 (0.1) ab | 17.8 (13.2) a |
| ZAM | O | 4.3 (0.7) c | 53.8 (36.8) b |
| A | 4.6 (0.3) ab | 6.1 (5.4) b |
| B | 4.8 (0.1) c | 4.7 (1.3) a |
| C | 4.8 (0.3) a | 5.5 (1.3) a |
| DOS | O | 4.4 (0.6) bc | 58.5 (32.9) b |
| A | 4.5 (0.2) b | 3.5 (0.8) b |
| B | 4.8 (0.1) bc | 5.5 (1.1) a |
| C | 5.1 (0.3) a | 11.1 (7.3) a |
| VIL | O | 4.8 (0.8) b | 74.8 (29.7) ab |
| A | 4.8 (0.1) a | 10.1 (8.5) a |
| B | 5.1 (0.1) a | 13.8 (3.2) a |
| C | 5.1 (0.2) a | 12.3 (6.8) a |

**Table S2.** Soil hydrophysical attributes between the study sites (DOS: Dos Puentes, SAN: Santiago, VIL: Villonaco, ZAM: Zamora-Huayco) included in this study according to organic (horizons Oi + Oe/Oa) and mineral (A-B-C horizons) layers.

| **Attributes** | **Site** | | | |
| --- | --- | --- | --- | --- |
| **SAN** | **ZAM** | **DOS** | **VIL** |
| **Organic layer** |  |  |  |  |
| Bulk density (Mg m−3) | 0.06 (0.02) a | 0.06 (0.07) a | 0.05 (0.03) a | 0.04 (0.02) a |
| **Mineral layer** |  |  |  |  |
| Bulk density (Mg m−3) | 1.13 (0.10) b | 1.37 (0.2) a | 1.07 (0.31) b | 1.20 (0.20) b |
| Clay (%) | 48.7 (17.0) a | 19.8 (7.4) c | 15.2 (9.8) c | 30.9 (3.7) b |
| Silt (%) | 24 (5.9) b | 45.9 (2.4) a | 45.2 (11.4) a | 27.4 (7.3) b |
| Sand (%) | 29.8 (14.1) b | 32.7 (8.7) b | 33.6 (17.9) ab | 42.2 (6.7) a |
| FC (mm) | 240.8 (23.7) a | 206 (2.8) ab | 208.4 (45.5) ab | 194.4 (13.8) b |
| WP (mm) | 176.9 (6.9) a | 103.7 (4.8) b | 102.4 (9.2) b | 144.9 (24.7) a |
| AWC (mm) | 68.6 (2.3) b | 102.2 (5.2) a | 97.1 (28.4) a | 60.3 (16.5) b |

Medians with median absolute deviations in parenthesis. Within each row, different letters indicate significant differences (Benjamini and Hochberg pairwise procedure (HB) after Kruskal-Wallis test, *p* < 0.05). nDOS= 6; nSAN= 3; nVIL= 7; nZAM= 7.

**Table S3.** SOC and soil total nutrient stocks in the mineral soil standardized to a depth of 60 cm (horizons A-B-C) for the study sites (DOS: Dos Puentes, SAN: Santiago, VIL: Villonaco, ZAM: Zamora-Huayco).

| **Nutrient (Mg ha−1)** | **Site** | | | |
| --- | --- | --- | --- | --- |
| **SAN** | **ZAM** | **DOS** | **VIL** |
| SOC | 91.08 (57.49) a | 118.75 (57.43) a | 109.75 (28.7) a | 169.4 (37.21) a |
| TN | 7.02 (3.68) a | 7.75 (2.37) a | 6.19 (0.91) a | 7.17 (1.37) a |
| P | 1.71 (0.91) ab | 1.72 (0.81) ab | 1.29 (0.46) b | 2.64 (0.85) a |
| K | 27.8 (6.08) a | 73.02 (9.83) a | 65.22 (33.88) a | 53.58 (22.49) a |
| Ca | 3.41 (2.7) a | 3.64 (4.17) a | 0.37 (0.32) a | 0.94 (1.16) a |
| Mg | 14.43 (1.08) a | 14.68 (2.78) a | 10.23 (6.18) a | 9.36 (4.72) a |
| S | 0.5 (0.37) a | 0.57 (0.25) a | 0.53 (0.21) a | 0.95 (0.18) a |
| Al | 368.73 (52.18) a | 270.37 (36.87) a | 208.89 (75.75) a | 359.21 (45.87) a |
| Fe | 244 (19.55) a | 124.05 (48.66) b | 131.42 (57.04) b | 236.89 (21.24) a |
| Mn | 0.76 (0.06) b | 1.02 (0.17) a | 1.25 (0.42) a | 0.62 (0.28) b |
| Cu | 0.1 (0.01) a | 0.1 (0.02) a | 0.1 (0.04) a | 0.17 (0.07) a |
| Na | 2.9 (0.21) ab | 3.32 (1.19) b | 2.4 (1.02) b | 5.36 (2.35) a |
| Ni | 0.05 (0.01) b | 0.09 (0.02) a | 0.07 (0.01) ab | 0.13 (0.09) a |
| Zn | 0.2 (0) a | 0.18 (0.09) a | 0.16 (0.04) a | 0.29 (0.2) a |

Medians and median absolute deviations MAD in parenthesis. Within each row, different letters indicate significant differences (Benjamini and Hochberg pairwise procedure (HB) after Kruskal-Wallis test, *p* < 0.05). nDOS= 6; nSAN= 3; nVIL= 7; nZAM = 7.

**Table S4.** Plant available nutrient stocks (exchangeable cations: NO3−-N, NH4+-N, Bray—PO4-P, K, Na, K, Ca, Mg, Al, Fe, Mn) in the organic layer (horizons Oi + Oe/Oa) according to study sites (DOS: Dos Puentes, SAN: Santiago, VIL: Villonaco, ZAM: Zamora-Huayco).

| **Nutrient (kg ha−1)** | **Site** | | | |
| --- | --- | --- | --- | --- |
| **SAN** | **ZAM** | **DOS** | **VIL** |
| NO3−-N | 0.14 (0.03) a | 0.12 (0.16) a | 0.05 (0.06) a | 0.03 (0.02) a |
| NH4+-N | 4.83 (0.92) b | 11.52 (3.07) a | 11.11 (3.16) a | 3.79 (2.44) b |
| PO4-P | 1.63 (0.05) ab | 3.79 (1.32) a | 3.06 (1.14) a | 0.87 (0.42) b |
| Na | 0.45 (0.03) a | 1.26 (1.3) a | 1.12 (0.2) a | 0.51 (0.33) a |
| K | 30.92 (3.69) b | 69.23 (34.58) a | 29.05 (4.59) b | 30.17 (3.49) b |
| Ca | 160.71 (5.21) a | 34.01 (22.34) a | 26.25 (17) a | 60.65 (48.08) a |
| Mg | 36.27 (10) a | 26.78 (6.77) a | 22.06 (8.24) a | 26.38 (18.06) a |
| Al | 1.63 (0.34) b | 25.5 (15.59) a | 9.45 (7.38) ab | 2.06 (2.57) b |
| Fe | 0.08 (0.11) b | 2 (2.03) a | 2.24 (2.07) a | 0.46 (0.62) b |
| Mn | 15.65 (11.07) a | 3.36 (1.51) b | 13.05 (8.28) a | 2.88 (3.76) b |

Medians with median absolute deviations in parenthesis. Within each row, different letters indicate significant differences (Benjamini and Hochberg pairwise procedure (HB) after Kruskal-Wallis test, *p* < 0.05). nDOS= 6; nSAN= 3; nVIL= 7; nZAM= 7.

**Table S5.** Factors of Variable Importance in the Projection (VIP) after the Partial Least Regression Analysis (variables selected after classification and regression trees). Additionally, relationships between dominant height of trees in 20 year old plantations (DH20) and environmental variables according to Spearman correlation coefficients and their level of significance (*p*-value).

| **Variable** | **VIP** | **rho** | ***p*-Value** |
| --- | --- | --- | --- |
| Altitude | 4.01 | 0.01 | 0.964 |
| Stones | 1.81 | −0.22 | 0.317 |
| Aspect | 1.68 | 0.03 | 0.885 |
| Base Saturation | 1.58 | 0.38 | 0.071 |
| Sand | 1.45 | −0.42 | 0.048 |
| Maximum root depth | 1.31 | 0.20 | 0.350 |
| Dominant root depth | 1.25 | −0.07 | 0.761 |
| Clay | 1.04 | 0.05 | 0.833 |
| N/Ca | 0.86 | −0.46 | 0.028 |
| Slope | 0.65 | −0.62 | 0.002 |
| Ca/Mg | 0.58 | 0.29 | 0.179 |
| Silt | 0.38 | 0.00 | 1.000 |
| C/N | 0.34 | −0.60 | 0.002 |
| Cation exchange capacity | 0.22 | 0.65 | 0.001 |
| N/P | 0.18 | 0.01 | 0.975 |
| Forest floor thickness | 0.16 | −0.14 | 0.517 |
| Potential Evapotranspiration | 0.09 | −0.01 | 0.971 |
| Short to medium term available stocks of K | 0.08 | 0.52 | 0.012 |
| Temperature | 0.08 | 0.06 | 0.782 |
| Available/stocks | 0.07 | 0.61 | 0.002 |
| Short to medium term available stocks of N | 0.07 | 0.22 | 0.317 |
| Short to medium term available stocks of Ca | 0.04 | 0.58 | 0.004 |
| Short to medium term available stocks of Mg | 0.04 | 0.30 | 0.159 |
| pH | 0.02 | 0.35 | 0.098 |
| N/K | 0.02 | 0.29 | 0.179 |
| K * | 0.01 | −0.37 | 0.082 |
| Bulk density | 0.01 | 0.34 | 0.107 |
| Short to medium term available stocks of P | 0.00 | 0.28 | 0.195 |

* Ratio of the short to medium term available K stocks concentrated in the organic layer with respect to the total soil depth.

**Figure S1.** Schematic distribution of soil profiles according to study sites (DOS: Dos Puentes, SAN: Santiago, VIL: Villonaco, ZAM: Zamora-Huayco). The y-axis represents the soil depth. Reference Soil Groups for study sites in parenthesis.
